# Supplementary material for: All-optical recreation of naturalistic neural activity with a multifunctional transgenic reporter mouse
Source: PubMed Central journal article supplement — Cell Rep. Author manuscript; Available in PMC 2023 Dec 29. (PMC10755854; doi:10.1016/j.celrep.2023.112909), 2023-08-04
Supplement: NIHMS1928254-supplement-1.pdf [file NIHMS1928254-supplement-1.pdf]

**Cell Reports, Volume 42**

**Supplemental information**

**All-optical recreation of naturalistic  
neural activity with a multifunctional  
transgenic reporter mouse**

**Hayley A. Bounds, Masato Sadahiro, William D. Hendricks, Marta Gajowa, Karthika Gopakumar, Daniel Quintana, Bosiljka Tasic, Tanya L. Daigle, Hongkui Zeng, Ian Antón Oldenburg, and Hillel Adesnik**

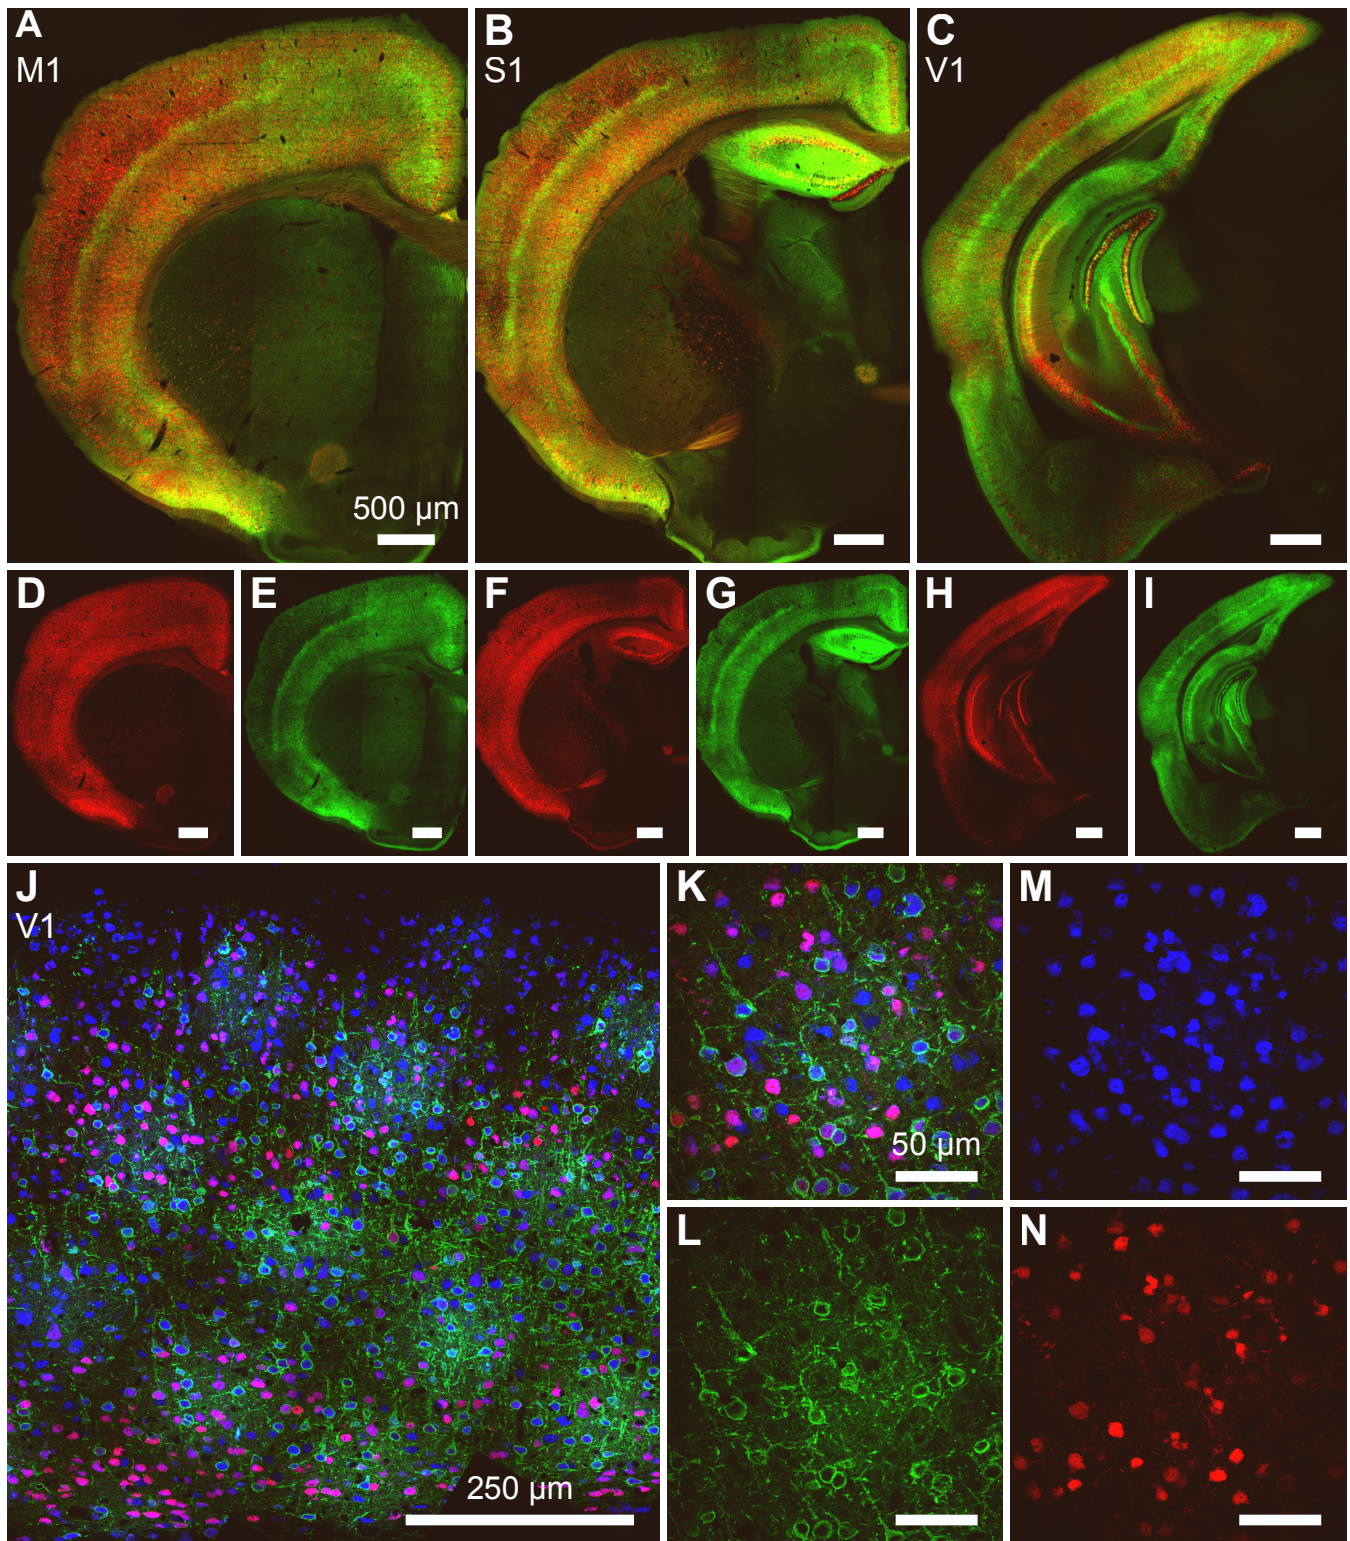

**Figure S1: Expression of nls-mRuby3 and GCaMP7s in Vglut1-Cre;Ai203, related to Figure 1.**

**A-I:** Confocal images of brain sections from Vglut1-Cre;Ai203 mice showing expression of st-Chrome-GCaMP7s (green) and nls-mRuby3 (red) (images stitched from multiple fields of view). A-C, composite images of both mRuby3 and st-Chrome-GCaMP7s. D-I, sections in A-C separated by channel.

**J:** One of five areas used for quantification of expressing cells, showing anti-NeuN (blue), nls-mRuby3 (red), st-Chrome-GCaMP7s (green). Area is composed of stitched fields of view taken at high magnification for optical sectioning, then rotated and cropped to get a full depth section.

**K-N:** one example field of view from the area in J. K: composite, M: anti-NeuN, L: st-Chrome-GCaMP7s, N: nls-mRuby3.

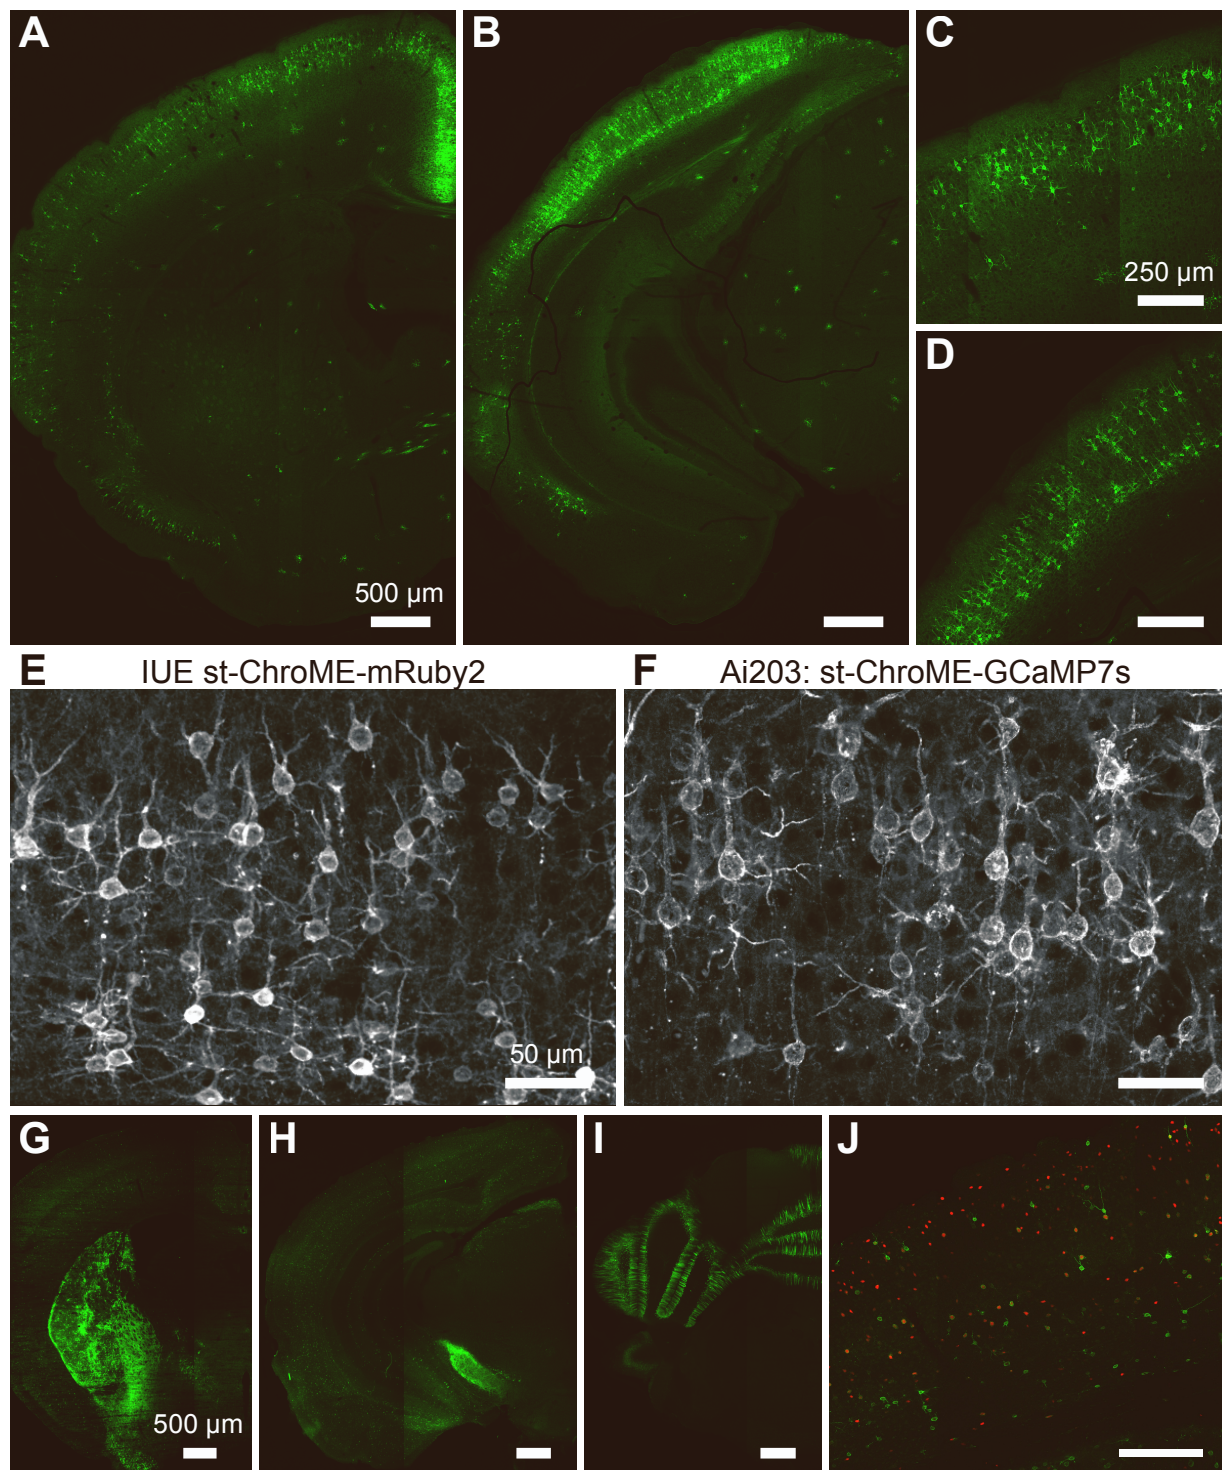

**Figure S2: Expression of GCaMP7s and nls-mRuby3 in *Cux2-CreERT2;Ai203* and *Vgat-IRES-Cre;Ai203* mice, related to Figure 1.**

**A-D:** Confocal images of post-mortem tissue from one example *Cux2-CreERT2;Ai203* mouse at two different coronal sections and two zooms showing st-ChroME-GCaMP7s expression in green (images stitched from multiple fields of view). A,C: primary motor cortex, B,D: primary visual cortex

**E-F:** Comparison of in utero electroporation st-ChroME-mRuby2 to transgenically expressed st-ChroME-GCaMP7s in *Cux2-CreERT2;Ai203*.

**G-J:** Confocal images of post-mortem tissue from one example *Vgat-IRES-Cre;Ai203* mouse at different coronal sections showing st-ChroME-GCaMP7s expression in green (images stitched from multiple fields of view). G: section containing motor cortex and striatum, H: section containing primary visual cortex, I: section of the cerebellum. J: section showing visual cortex.

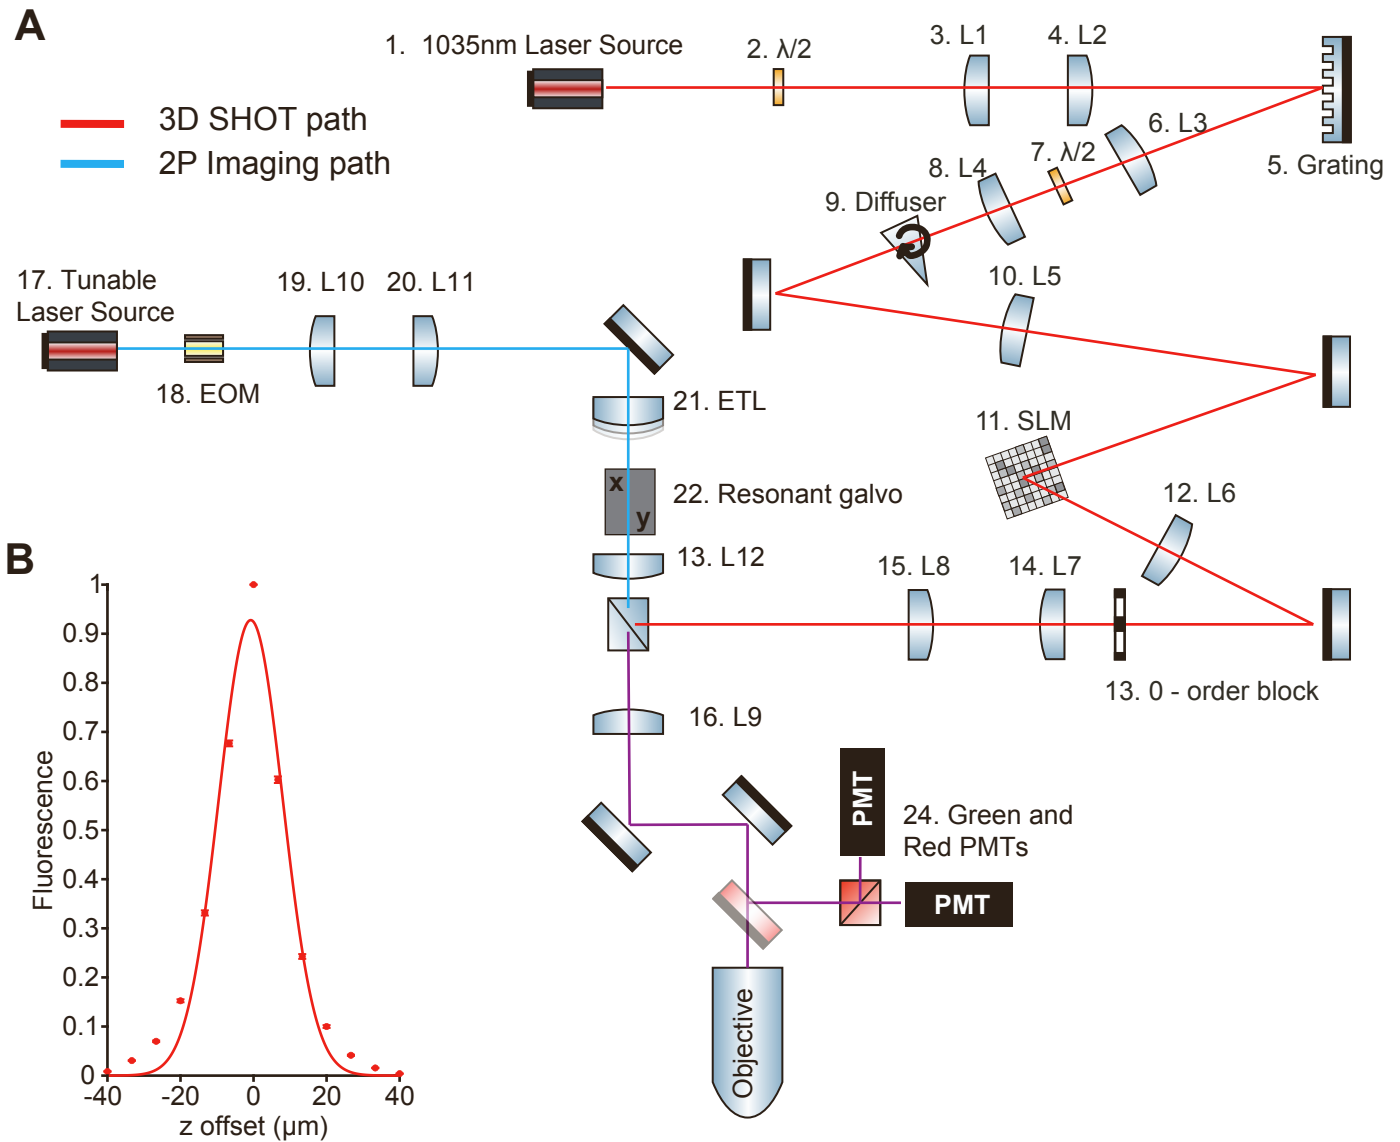

**Figure S3: Optical path for combined 2-photon imaging and holographic optogenetics, related to STAR Methods.**

**A:** Schematic of combined 2-photon imaging and holographic photostimulation (3D-SHOT) paths for Setup #1 (see Supplementary Table 1 and methods for details). Components 1-15 (red beam line) correspond to the 3D-SHOT path and components 17-22 (blue beam line) correspond to the 2-photon imaging path. The imaging path and photostimulation path are combined before the tube lens (element 16) with a polarizing beam splitter. Component 16 and the objective are shared by the combined imaging and 3D-SHOT path (purple beam line). Dichroic mirrors and PMTs are used in the 2-photon imaging collection path (red and green beam lines). Abbreviations: L: lens, SLM: spatial light modulator, EOM: electro-optical modulator (Pockels cell), ETL: electrically tunable lens, PBS: polarizing beam splitter, PMT: photomultiplier tube.

**B:** Axial ( $z$ ) resolution of the average of 1110 measured holograms in Setup #1 measured by a camera capturing intensity on a fluorescent slide. FWHM: 20.7  $\mu\text{m}$ . Data are shown as mean  $\pm$  sem.

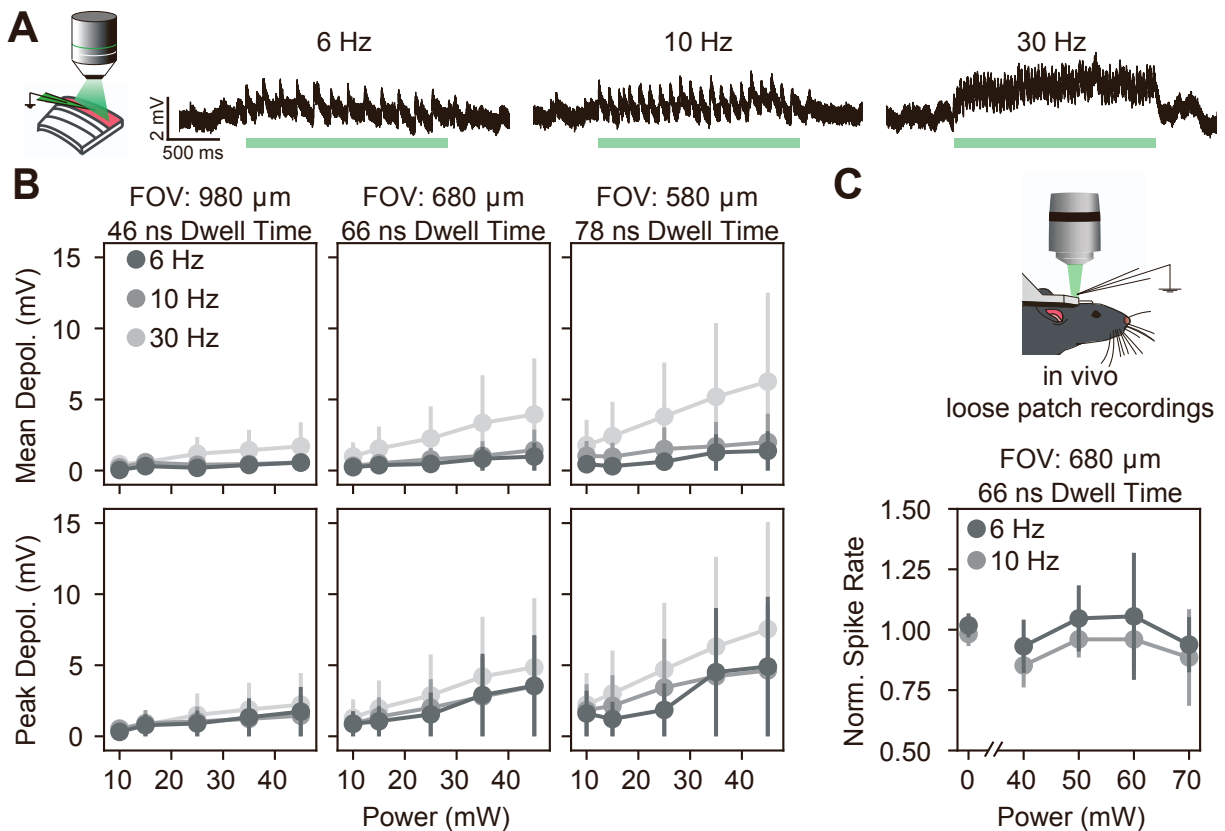

**Figure S4: 2p scanning-evoked activation in vitro and in vivo, related to Figure 1.**

**A:** Left, schematic of the experimental setup. Whole-cell recordings were made during 2p imaging with different imaging rates, powers, and scanning field of view (FOV) sizes. Scanning-induced depolarization, or “cross talk,” was recorded. Right, three example traces from one cell recorded at different frequencies, all with 45 mW imaging power and a 980  $\mu\text{m}$  FOV.

**B:** Mean (top) and peak (bottom) depolarization during 2p imaging of opsin-positive neurons. From left to right, increasing zoom and decreasing field of view size, and increasing dwell times (FOV 980: 46 ns/ $\mu\text{m}$ ; FOV 680: 66 ns/ $\mu\text{m}$ ; FOV 580: 78 ns/ $\mu\text{m}$ ).

**C:** Crosstalk measurements in vivo. Normalized spike rates without imaging (0 power) and with imaging at different powers and imaging rates. Effect of power:  $p=0.88$ , effect of imaging rate:  $p=0.24$ , effect of power x imaging rate:  $p=0.99$ , repeated measures ANOVA,  $n=4$  cells).

Data are shown as mean  $\pm$  sem.

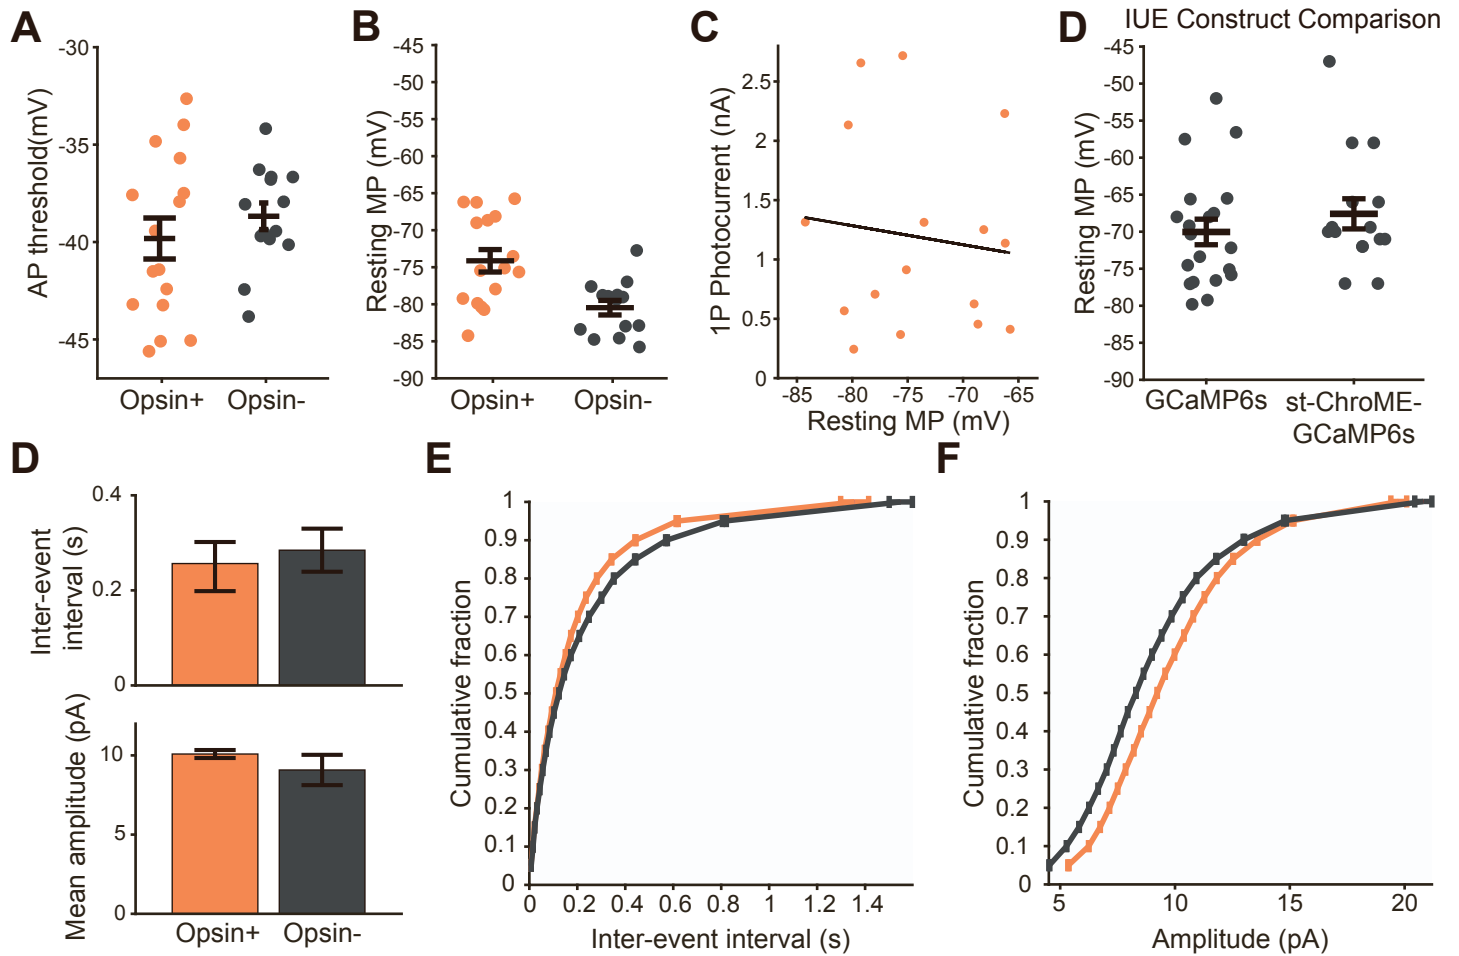

**Figure S5: Comparison of basic physiological and synaptic properties of opsin+ and opsin- neurons in Ai203 mice, related to Figure 2.**

**A:** Action potential (AP) threshold, measured by electrical stimulation, for opsin+ and opsin- neurons, categorized based on 1p photocurrent ( $p=0.53$ ;  $n=16$  cells for opsin+ and  $n=14$  for opsin-; t-test).

**B:** Resting membrane potential (MP) for the cells in A ( $p=.002$ ,  $n=16$  cells for opsin+ and  $n=14$  for opsin-; t-test)

**C:** Magnitude of 1p photocurrent vs resting membrane potential for cells in A (slope= $-.016$ ,  $R^2$  0.014,  $p=.66$  that slope is different than 0)

**D:** Data from animals with in utero electroporation (IUE) of either a GCaMP6s or st-ChroME-GCaMP6s construct showing resting membrane potential ( $p=0.364$ ; t-test;  $n=20$  cells for GCaMP6s and  $n=15$  cells for st-ChroME-GCaMP6s).

**E:** Comparison of miniature excitatory post-synaptic currents (mEPSCs) in opsin positive and opsin negative cells. Top, inter-event intervals between mEPSCs, bottom, mean amplitude of mEPSCs.

**F:** Cumulative distribution of interevent intervals between opsin+ and opsin- cells ( $p<0.0001$ , KS test.  $n=8$  cells).

**G:** Cumulative distribution of mEPSC amplitude between opsin + and opsin – cells ( $p<0.0001$ , KS test,  $n=8$  cells).

Data are shown as mean  $\pm$  sem.

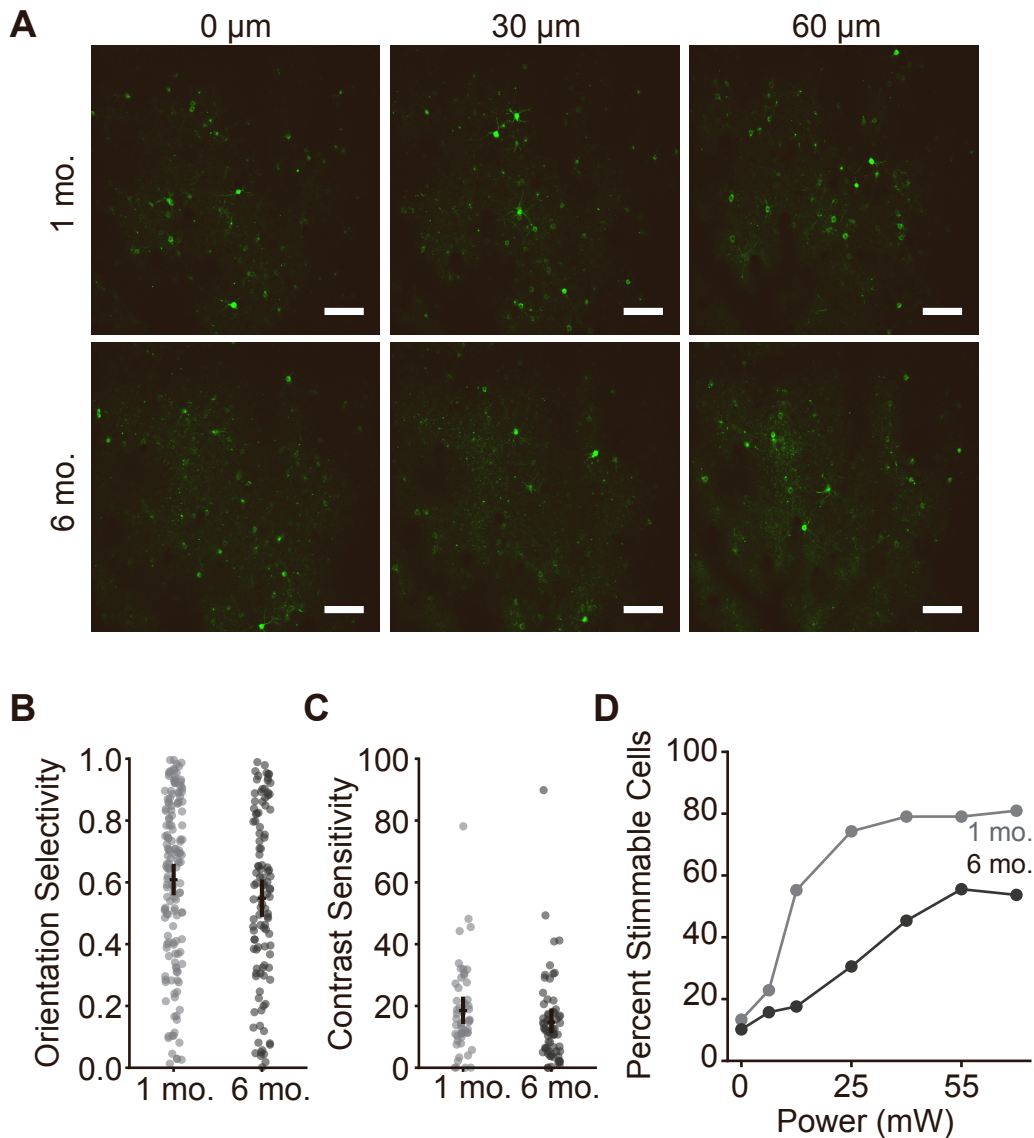

**Figure S6: Long-term transgene expression in Ai203 mice, related to Figure 2.**

**A:** in vivo images from a matched field-of-view (FOV) from a single Ai203 mouse captured at 3 different z-planes (columns; 0, +30, +60  $\mu\text{m}$ ) at 1-month post-windowing (top row) and 6-months post-windowing (bottom row). Scale bar, 100  $\mu\text{m}$ .

**B:** Comparison of orientation selectivity (orientation selectivity index, OSI) measured at 1-month (left, light grey) and 6-months (right, dark grey) post-windowing for matching FOVs. OSI: 1-month,  $0.61 \pm 0.02$ ,  $n=152$  cells; 6-months,  $0.55 \pm 0.03$ ,  $n=110$  cells.

**C:** Comparison of contrast sensitivity (C50, Naka-Rushton fit) measured at 1-month (left, light grey) and 6 months (right, dark grey) post-windowing for matching FOVs. C50: 1-month,  $18 \pm 2\%$ ,  $n=52$  cells; 6-months,  $15 \pm 2\%$ ,  $n=68$  cells.

**D:** Quantification of percent neurons activated at various powers between 1-month (light grey) and 6-month timepoints (percent activatable at 70 mW: 1-month, 81%, 6-month, 54%).

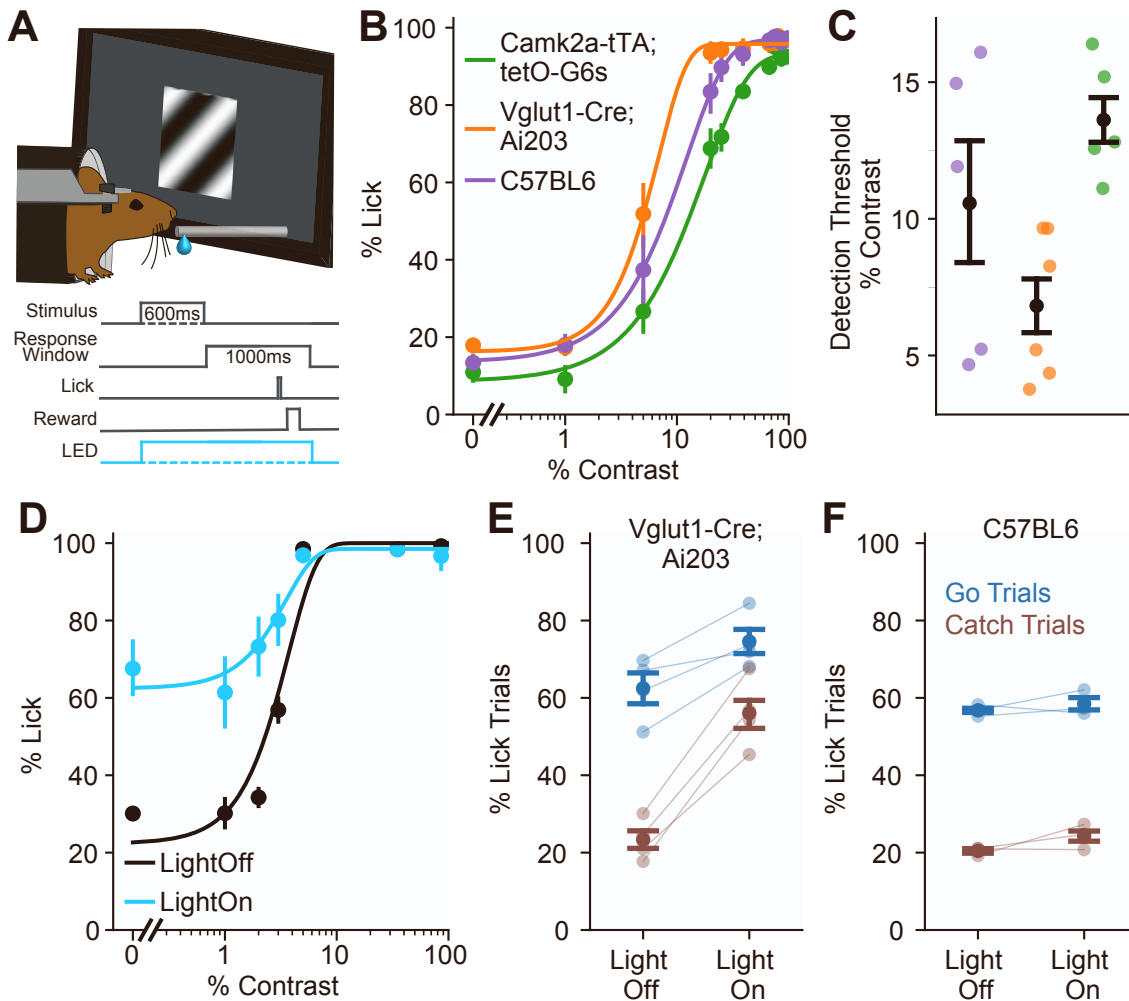

**Figure S7: Optogenetic manipulation of operant behavior in *Vglut1-Cre;Ai203* mice alters performance, related to Figure 2.**

**A:** Schematic of the visual detection task. Gratings of varying contrasts were presented to mice trained to lick during a 1 second response window following stimulus presentation to indicate detection.

**B:** Psychometric curves averaged across mice for of the three strains tested.  $n=6$  mice for *Vglut1-Cre;Ai203*,  $n=5$  each for wildtype and *Camk2a-tTA;teto-GCaMP6s*.

**C:** Comparison of detection threshold across genotypes, points are individual mice.  $p=0.004$ , one-way ANOVA, with post-hoc Tukey test: *Ai203* vs wt  $p=0.31$ ; *Ai203* vs *Camk2a*  $p=0.0046$ ; *Camk2a* vs wt  $p=0.21$ ;  $n=16$  mice

**D:** Psychometric curves averaged across four sessions from one example mouse with (blue) and without (black) 1p stimulation at 470 nm of V1.

**E:** Comparison of performance metrics with and without 1p stimulation for *Vglut1-Cre;Ai203* mice. Hit (blue) and False Alarm (brown) rates (hit rate:  $p=0.019$ , false alarm rate:  $p=0.0016$ , paired t-test,  $n=4$  mice). Points are individual mice, average of four sessions per mouse.

**F:** Comparison of performance metrics with and without 1p stimulation for wildtype mice. Hit (blue) and False Alarm (brown) (hit rate:  $p=0.51$ ; false alarm rate:  $p=0.25$ ; paired t-test;  $n=3$  mice). Points are individual mice, average of four sessions per mouse.

Data are presented as mean  $\pm$  bootstrapped 68% confidence interval.



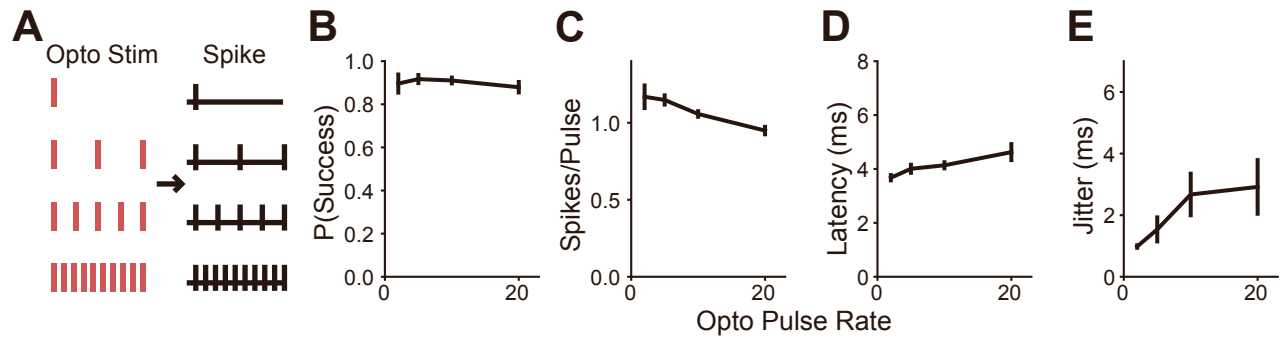

**Figure S8: Statistics on spiking for Ai203 cells recorded in vivo, related to Figure 3.**

**A:** Schematic of experiment showing how pulse number and stimulation rate vary together.

**B:** P(Success), defined as the chance that a single pulse evokes at least one spike, for varying pulse numbers/rates (n=11 cells).

**C:** Spikes/pulse, the average number of spikes elicited by a single pulse, for varying pulse numbers/rates (n=11 cells).

**D:** Latency, the time from the start of a 5 ms pulse to the first spike, for varying pulse numbers/rates (n=11 cells).

**E:** Jitter, the standard deviation of the latency, for varying pulse numbers/rates (n=11 cells).

Data are shown as mean  $\pm$  sem.

**Supplementary Table 1: Details of microscope optics**

| Lens # | Focal Distance, Setup #1 | Focal Distance, Setup #2 | Path          |
|--------|--------------------------|--------------------------|---------------|
| L1     | 80                       | -                        | 3D SHOT       |
| L2     | 500                      | -                        | 3D SHOT       |
| L3     | 200                      | 100                      | 3D SHOT       |
| L4     | 40                       | 20                       | 3D SHOT       |
| L5     | 500                      | 500                      | 3D SHOT       |
| L6     | 200                      | 200                      | 3D SHOT       |
| L7     | 250                      | 200                      | 3D SHOT       |
| L8     | 200                      | 200                      | 3D SHOT       |
| L9     | 180                      | 180                      | MOM tube lens |
| L10    | 30                       | 75                       | Imaging path  |
| L11    | 60                       | 100                      | Imaging path  |
| L12    | 50                       | 50                       | Scan lens     |
